# Supplementary material for: Characterization of WMnCeTiOx catalysts prepared by different methods for the selective reduction of NO with NH3
Source: Royal Society of Chemistry journal article supplement (doi:10.1039/d1nj03891e), 2021-01-01
Supplement: d1nj03891e1.pdf [file d1nj03891e1.pdf]

1 **Characterization of WMnCeTiO<sub>x</sub> Catalysts Prepared by Different Methods for**  
2 **Selective Reduction of NO with NH<sub>3</sub>**

3 Xiaodi Li<sup>a</sup>, Zhitao Han<sup>b,c\*</sup>, Qingdong Shi<sup>a</sup>, Xinxin Wang<sup>b</sup>, Xitian Wu<sup>b</sup>, Yu Gao<sup>b</sup>,

4 Chenglong Li<sup>b</sup>, Gang Liu<sup>b</sup>

5 a. School of Resources and Environmental Sciences, XinJiang University, Wulumuqi,  
6 830000, China;

7 b. Marine Engineering College, Dalian Maritime University, Dalian 116026, China;

8 c. Liaoning Research Center for Marine Internal Combustion Engine Energy-Saving,  
9 Dalian 116026, China;

10 Correspondence information: Dr. Zhitao Han, Dalian Maritime University, No.1,

11 Linghai Road, Dalian 116026, China, hanzt@dlnu.edu.cn

12 **1. XPS**

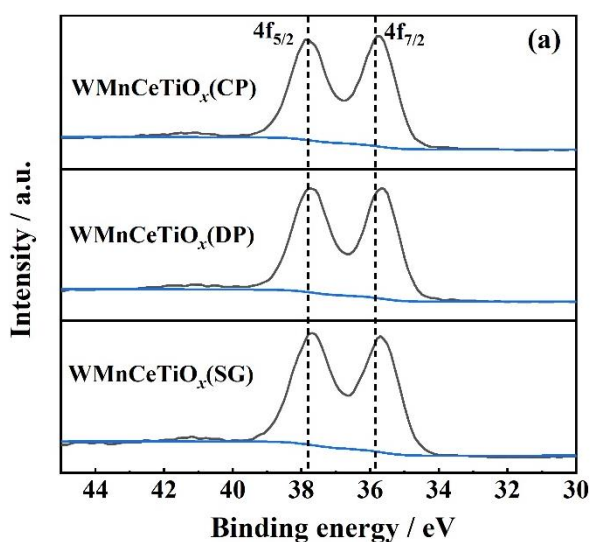

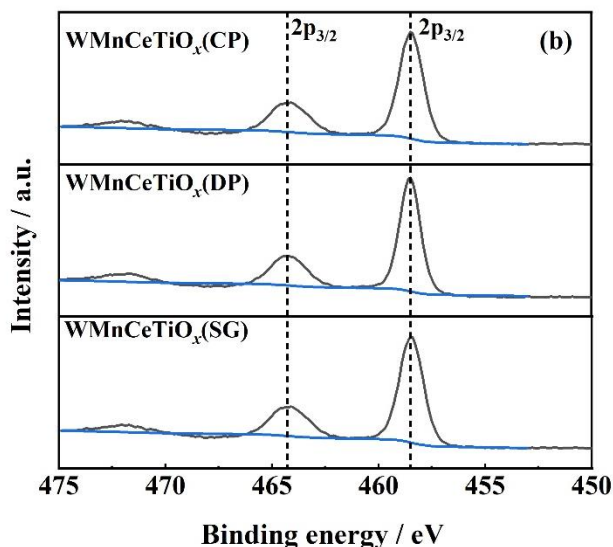

Fig. S1 XPS spectra of W 2*f*(a) and Ti 2*p* (b) of prepared catalysts

The spectra of W 2*f* and Ti 2*p* were shown in Fig. S1. The XPS spectra of W 2*f* over the prepared catalysts were presented in Fig. S1(a). The XPS spectra were divided into two sub-peaks of WO<sub>3</sub>, indicating that the main existing form of W on the prepared catalysts is WO<sub>3</sub>. It suggested that chemical valence may not be the main reason for SCR performance of the prepared for WMnCeTiO<sub>x</sub> catalysts. The XPS spectra of Ti 2*p* over prepared catalysts were presented in Fig. S1(b), which can be fitted into two peaks. However, the spectrogram of Ti 2*P* in each catalyst is similar, indicating that the chemical valence state of Ti may not the main reason for the difference of catalyst activity.

## 2. In-situ DRIFTS

### 2.1 Adsorption of NH<sub>3</sub>

Fig. S2 displayed the in-situ DRIFTS spectra of NH<sub>3</sub> adsorption over prepared catalysts. After pretreatment of the catalyst sample, 500 ppm of NH<sub>3</sub> was introduced into the feed gas for 30 min, and then IR spectra were recorded. Several bands were observed in the ranges of 1000–1700 and 3000–4000 cm<sup>-1</sup>. the band at 1201, 1590 cm<sup>-1</sup> could be

33 assigned to symmetric and asymmetric bending vibrations of the N–H bonds in NH<sub>3</sub>  
34 coordinately linked to Lewis acid sites while the bands at 1675 and 1435 cm<sup>-1</sup> could be  
35 attributed to asymmetric and symmetric bending vibrations of NH<sub>4</sub><sup>+</sup> species on  
36 Brønsted acid sites. In the NH stretching region, bands were found at 3355, 3260 and  
37 3160 cm<sup>-1</sup>.

38 The DRIFTS spectra of NH<sub>3</sub> adsorption on WMnCeTiO<sub>x</sub>(CP) catalyst were very similar  
39 to that of WMnCeTiO<sub>x</sub>(DP) and WMnCeTiO<sub>x</sub>(SG) catalyst. However, the band at 1201,  
40 1435, 1790 and 1675 cm<sup>-1</sup> were much stronger than WMnCeTiO<sub>x</sub>(DP) and  
41 WMnCeTiO<sub>x</sub>(SG) catalysts, which indicated that the surface acidity (Lewis and  
42 Brønsted acid sites) of WMnCeTiO<sub>x</sub>(CP) catalyst is stronger than WMnCeTiO<sub>x</sub>(DP)  
43 and WMnCeTiO<sub>x</sub>(SG) catalyst, and WMnCeTiO<sub>x</sub>(CP) catalyst has the higher NO<sub>x</sub>  
44 conversion efficiency than WMnCeTiO<sub>x</sub>(DP) and WMnCeTiO<sub>x</sub>(SG) catalysts at low  
45 temperature (below 225 °C).

46 In brief, the results of both NH<sub>3</sub>-TPD and DRIFTS characterizations indicated that the  
47 adsorption capacity for NH<sub>3</sub> of the different WMnCeTiO<sub>x</sub> catalysts decreases in the  
48 order of WMnCeTiO<sub>x</sub>(CP) > WMnCeTiO<sub>x</sub>(DP) > WMnCeTiO<sub>x</sub>(SG), which was  
49 consistent with the change of catalytic activities for the corresponding catalysts. Thus,  
50 it can be concluded that the difference between the activities of the three WMnCeTiO<sub>x</sub>  
51 catalysts is related to their NH<sub>3</sub> adsorption abilities.

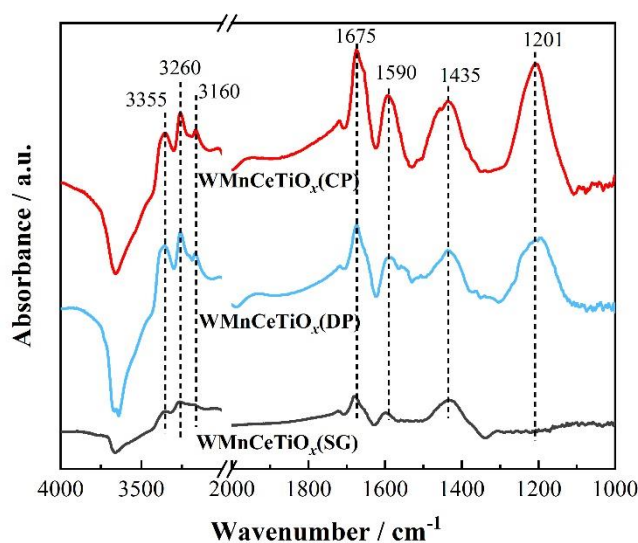

52

53 Fig. S2 DRIFTS spectra of  $\text{NH}_3$  adsorption on  $\text{WMnCeTiO}_x(\text{CP})$ ,  $\text{WMnCeTiO}_x(\text{DP})$

54 and  $\text{WMnCeTiO}_x(\text{SG})$  catalysts at 250 °C

## 55 2.2. Adsorption of $\text{NO} + \text{O}_2$

56 Fig. S3. showed in-situ DRIFTS spectra of  $\text{NO} + \text{O}_2$  adsorption over the prepared  
 57 catalysts. After pretreatment of each catalyst sample, the catalysts were exposed to a  
 58 flow of 500 ppm  $\text{NO}$  and 5 %  $\text{O}_2$  at 250 °C for 30 min, and then IR spectra were recorded.  
 59 Several distinct peaks were observed in the ranges of 1000-2000  $\text{cm}^{-1}$  on  $\text{WMnCeTiO}_x$   
 60 catalyst. The bands appeared at 1358, 1370, 1545 and 1580  $\text{cm}^{-1}$ , which were ascribed  
 61 to bidentate nitrate (1545, 1580  $\text{cm}^{-1}$ ), monodentate nitrate( 1370  $\text{cm}^{-1}$ ) .All of the bands  
 62 over  $\text{WMnCeTiO}_x(\text{CP})$  catalyst were higher than  $\text{WMnCeTiO}_x(\text{DP})$  and  
 63  $\text{WMnCeTiO}_x(\text{SG})$  catalysts. It demonstrated that more nitrate species had been  
 64 adsorbed on the surface of  $\text{WMnCeTiO}_x(\text{CP})$  catalyst. It has been reported that the  
 65 adsorbed nitrate species can rapidly react with adjacent adsorbed  $\text{NH}_4^+$  or  $\text{NH}_3$  to  
 66 produce more reactive intermediates, which can further react with gaseous  $\text{NO}$  to form  
 67  $\text{N}_2$  and  $\text{H}_2\text{O}$  and promote the “fast SCR” reaction. This is consistent with the results of  
 68 the activity measurements.

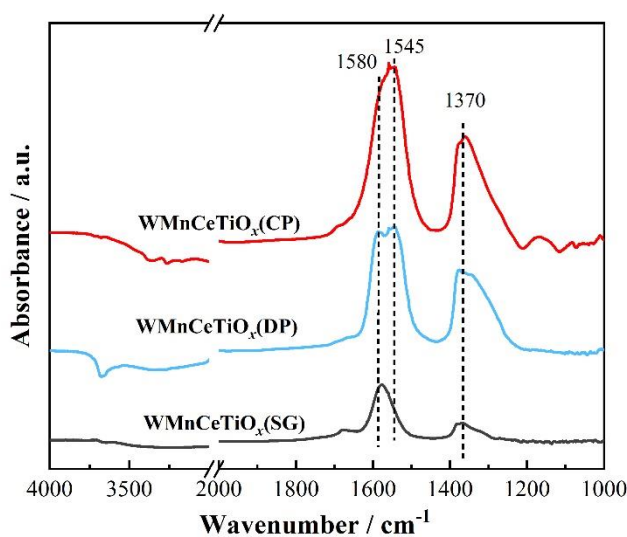

69

70 Fig. S3 In-situ DRIFTS spectra of NO + O<sub>2</sub> adsorption on WMnCeTiO<sub>x</sub>(CP), WMnCeTiO<sub>x</sub>(DP)  
71 and WMnCeTiO<sub>x</sub>(SG) catalysts

72

73 **Table S1** Comparison of NO<sub>x</sub> conversion and SO<sub>2</sub> resistance with the literatures related with  
74 WMnCeTiO<sub>x</sub> catalysts

| Catalysts                              | Reaction condition                                                                                                                                        | NO <sub>x</sub> conversion | SO <sub>2</sub> resistance | Reference |
|----------------------------------------|-----------------------------------------------------------------------------------------------------------------------------------------------------------|----------------------------|----------------------------|-----------|
| WMnCeTiO <sub>x</sub> (CP)             | NO = NH <sub>3</sub> = 500 ppm,<br>O <sub>2</sub> = 5 %, GHSV = 30000 h <sup>-1</sup> ,<br>flow rate 500 mL/min,<br>SO <sub>2</sub> = 200 ppm (when used) | 90 %<br>(@200 °C)          | 89 %<br>(@250 °C, 5 h)     | This work |
| WMnCeTiO <sub>x</sub> (DP)             | NO = NH <sub>3</sub> = 500 ppm,<br>O <sub>2</sub> = 5 %, GHSV = 30000 h <sup>-1</sup> ,<br>flow rate 500 mL/min,<br>SO <sub>2</sub> = 200 ppm (when used) | 90 %<br>(@200 °C)          | 76 %<br>(@250 °C, 5 h)     | This work |
| WMnCeTiO <sub>x</sub> (SG)             | NO = NH <sub>3</sub> = 500 ppm,<br>O <sub>2</sub> = 5%, GHSV = 30000 h <sup>-1</sup> ,<br>flow rate 500 mL/min,<br>SO <sub>2</sub> = 200 ppm (when used)  | 90 %<br>(@270 °C)          | 16 %<br>(@250 °C, 5 h)     | This work |
| CeO <sub>2</sub> -WO <sub>3</sub> (SP) | NO = NH <sub>3</sub> = 500 ppm,<br>O <sub>2</sub> = 3 %, GHSV = 47000 h <sup>-1</sup> ,                                                                   | 85 %                       | -                          | [1]       |

| Catalysts                                                    | Reaction condition                                                                                                                                         | NO <sub>x</sub> conversion | SO <sub>2</sub> resistance | Reference |
|--------------------------------------------------------------|------------------------------------------------------------------------------------------------------------------------------------------------------------|----------------------------|----------------------------|-----------|
|                                                              | flow rate 300 mL/min,                                                                                                                                      | (@200 °C)                  |                            |           |
| CeO <sub>2</sub> -WO <sub>3</sub> (IM)                       | NO = NH <sub>3</sub> = 500 ppm,<br>O <sub>2</sub> = 3%, GHSV = 47000 h <sup>-1</sup> ,<br>flow rate 300 mL/min,                                            | 79 %<br>(@200 °C)          | -                          | [1]       |
| CeO <sub>2</sub> -WO <sub>3</sub> (SG)                       | NO = NH <sub>3</sub> = 500 ppm,<br>O <sub>2</sub> = 3 %, GHSV = 47000 h <sup>-1</sup> ,<br>flow rate 300 mL/min,                                           | 20 %<br>(@ 200 °C)         | -                          | [1]       |
| Ce/TiO <sub>2</sub> (IM)                                     | NO = NH <sub>3</sub> = 500 ppm,<br>O <sub>2</sub> = 5 %, GHSV = 30000 h <sup>-1</sup> ,<br>flow rate 500 mL/min,<br>SO <sub>2</sub> = 100 ppm (when used)  | 92 %<br>(@ 275 °C)         | 85 %<br>(@ 300 °C, 10 h)   | [2]       |
| Ce-Nb-Ti(CP)                                                 | NO = NH <sub>3</sub> = 1000 ppm,<br>O <sub>2</sub> = 3 %, GHSV = 90000 h <sup>-1</sup> ,<br>flow rate 500 mL/min,<br>SO <sub>2</sub> = 500 ppm (when used) | 80 %<br>(@ 250 °C)         | 50 %<br>(@ 250 °C, 10 h)   | [3]       |
| Ce-Nb-Ti(IM)                                                 | NO = NH <sub>3</sub> = 1000 ppm,<br>O <sub>2</sub> = 3 %, GHSV = 90000 h <sup>-1</sup> ,<br>flow rate 500 mL/min,<br>SO <sub>2</sub> = 500 ppm (when used) | 80 %<br>(@ 250 °C)         | 48 %<br>(@ 250 °C, 10 h)   | [3]       |
| Ce-Nb-Ti(SP)                                                 | NO = NH <sub>3</sub> = 1000 ppm,<br>O <sub>2</sub> = 3 %, GHSV = 90000 h <sup>-1</sup> ,<br>flow rate 500 mL/min,<br>SO <sub>2</sub> = 500 ppm (when used) | 55 %<br>(@ 250 °C)         | 42 %<br>(@ 250 °C, 10 h)   | [3]       |
| CeWTiO <sub>x</sub> (IM)                                     | NO = NH <sub>3</sub> = 1000 ppm,<br>O <sub>2</sub> = 5 %, GHSV = 30000 h <sup>-1</sup> ,<br>flow rate 500 mL/min,<br>SO <sub>2</sub> = 100 ppm (when used) | 88 %<br>(@ 250 °C)         | 72 %<br>(@ 250 °C, 7 h)    | [4]       |
| CeO <sub>2</sub> -ZrO <sub>2</sub> -<br>WO <sub>3</sub> (IM) | NO = NH <sub>3</sub> = 600 ppm,<br>O <sub>2</sub> = 5 %, GHSV = 50000 h <sup>-1</sup> ,<br>flow rate 833 mL/min,                                           | 20 %<br>(@ 200 °C)         |                            | [5]       |
| CeO <sub>2</sub> -ZrO <sub>2</sub> -                         | NO = NH <sub>3</sub> = 600 ppm,                                                                                                                            | 39 %                       | -                          | [5]       |

| Catalysts                                                    | Reaction condition                                                                                               | NO <sub>x</sub> conversion<br>(@ 200°C) | SO <sub>2</sub> resistance | Reference |
|--------------------------------------------------------------|------------------------------------------------------------------------------------------------------------------|-----------------------------------------|----------------------------|-----------|
| WO <sub>3</sub> (SG)                                         | O <sub>2</sub> = 5 %, GHSV = 50000 h <sup>-1</sup> ,<br>flow rate 833 mL/min,                                    | (@ 200°C)                               |                            |           |
| CeO <sub>2</sub> -ZrO <sub>2</sub> -<br>WO <sub>3</sub> (HT) | NO = NH <sub>3</sub> = 600 ppm,<br>O <sub>2</sub> = 5 %, GHSV = 50000 h <sup>-1</sup> ,<br>flow rate 833 mL/min, | 89 %<br>(@ 200 °C)                      | -                          | [5]       |
| CeO <sub>2</sub> -ZrO <sub>2</sub> -<br>WO <sub>3</sub> (SP) | NO = NH <sub>3</sub> = 600 ppm,<br>O <sub>2</sub> = 5 %, GHSV = 50000 h <sup>-1</sup> ,<br>flow rate 833 mL/min, | 89 %<br>(@ 200 °C)                      | -                          | [5]       |
| Mn/CeO <sub>2</sub> (HT)                                     | NO = NH <sub>3</sub> = 500 ppm,<br>O <sub>2</sub> = 5 %, GHSV = 30000 h <sup>-1</sup> ,<br>flow rate 600 mL/min  | 89 %<br>(@ 210 °C)                      | -                          | [6]       |

75

76 **Reference:**

77 [1] Liu. C, Chen. L, Chang. H, Ma. L, Peng. Y, Arandiyan, H, *Catal. Commun.*, 2013,  
78 **40**, 145-148.

79 [2] Xu. W, Yu. Y, Zhang. C, He H, *Catal. Commun.*, 2008, **9**, 1453-1457.

80 [3] Jiang. Y, Gao. W, Bao. C, Yang. Z, Wang. X, *Mol. Catal.*, 2020,**496**, 111161.

81 [4] Huang. X, Zhang. G. A, Dong. F. A, Tang. Z A, *J. Ind. Eng. Chem.*, 2019, **69**, 66-76

82 [5] Ning. P, Song. Z, Li. H, Zhang. Q, Liu. X, Zhang. J, *Appl. Surf. Sci.*, 2015, **332**,  
83 130-137.

84 [6] Ge. G, Shi. J. W, Chang. L, Chen. G, Fan. Z, Niu. C, *Appl. Surf. Sci.*, 2017, **411**,  
85 338-346.
